# Supplementary material for: The Association of Physical Activity and Sedentary Behavior with Maternal and Cord Blood Anti-Oxidative Capacity and HDL Functionality: Findings of DALI Study
Source: MDPI journal article supplement (doi:10.3390/antiox12040827), 2023-03-28
Supplement: s1 [file s1]

**Supplementary Table S1.** Characteristics of women selected for analyses and those excluded.

| <b>Maternal characteristics</b>                     | <b>Included<br/>N=122</b> | <b>Excluded<br/>N=463</b> | <b>P</b> |
|-----------------------------------------------------|---------------------------|---------------------------|----------|
| Age, years, mean $\pm$ SD                           | 32.8 $\pm$ 5.2            | 31.6 $\pm$ 5.4            | 0.03     |
| Prepregnancy BMI, kg/m <sup>2</sup> , mean $\pm$ SD | 33.7 $\pm$ 4.1            | 33.8 $\pm$ 4.3            | 0.75     |
| Gestational weight gain, kg, mean $\pm$ SD          | 8.2 $\pm$ 4.9             | 7.9 $\pm$ 4.7             | 0.44     |
| Primiparous, n (%)                                  | 55 (45%)                  | 242 (52%)                 | 0.16     |
| Married/living with a partner, n (%)                | 114 (93%)                 | 433 (94%)                 | 0.98     |
| High education, n (%)                               | 80 (66%)                  | 238 (51%)                 | 0.01     |
| European descent, n (%)                             | 108 (89%)                 | 400 (86%)                 | 0.54     |
| Smoking, n (%) n=548                                | 12 (10%)                  | 67 (15%)                  | 0.10     |
| GDM, n (%) n=476                                    | 27 (22%)                  | 136 (29%)                 | 0.001    |
| Caesarean Section, n (%) N=516                      | 33 (27%)                  | 134 (29%)                 | 0.17     |
| Spontaneous Delivery, n (%) N=574                   | 74 (61%)                  | 238 (51%)                 | 0.95     |
| Neonatal characteristics                            |                           |                           |          |
| Gestational age at birth, week, mean $\pm$ SD       | 39.8 $\pm$ 1.3            | 39.5 $\pm$ 479.7          | 0.45     |
| Birthweight, g, mean $\pm$ SD                       | 3592 $\pm$ 480            | 3439.5 $\pm$ 570.3        | 0.01     |
| Female sex, n (%) n=529                             | 57 (47%)                  | 201 (43%)                 | 0.61     |

**Supplementary Table S2.** Associations (linear regression models) of maternal moderate-to-vigorous physical activity (MVPA) and sedentary time (ST) with pro/anti-oxidative stress and HDL-related markers in cord blood.

| < 20 weeks (n=44)           | AOPP <sup>a</sup> ,<br>umol/L | P           | Inhibition of<br>oxidation, % | P                | AE activity,<br>mM/min/ml | P           | Cholesterol<br>Efflux, % | P    |
|-----------------------------|-------------------------------|-------------|-------------------------------|------------------|---------------------------|-------------|--------------------------|------|
|                             | B (95% CI)                    |             | B (95% CI)                    |                  | B (95% CI)                |             | B (95% CI)               |      |
| Sedentary time (% weartime) | 0.01 (-0.02, 0.03)            | 0.09        | <b>0.38 (0.18; 0.59)</b>      | <b>&lt;0.001</b> | 0.11 (-0.99; 1.23)        | 0.84        | 0.01 (-0.06; 0.08)       | 0.73 |
| MVPA (min/day)              | 0.01 (-0.03, 0.01)            | 0.20        | <b>0.13 (0.05; 0.22)</b>      | <b>0.003</b>     | <b>0.59 (0.14; 1.05)</b>  | <b>0.01</b> | -0.01 (-0.04; 0.02)      | 0.46 |
| <b>24-28 weeks (n=38)</b>   |                               |             |                               |                  |                           |             |                          |      |
| Sedentary time (% weartime) | 0.01 (-0.01, 0.03)            | 0.27        | 0.20 (-0.03;<br>0.43)         | 0.08             | 0.16 (-0.98; 1.29)        | 0.78        | -0.01 (-0.08; 0.06)      | 0.90 |
| MVPA (min/day)              | 0.003 (-0.01, 0.01)           | 0.5         | <b>0.11 (0.02; 0.21)</b>      | <b>0.02</b>      | <b>0.49 (0.06; 0.98)</b>  | <b>0.05</b> | -0.00 (-0.03; 0.03)      | 0.81 |
| <b>35-37 weeks (n=34)</b>   |                               |             |                               |                  |                           |             |                          |      |
| Sedentary time (% weartime) | 0.02 (-0.002, 0.03)           | 0.07        | 0.2 (-0.09; 0.49)             | 0.16             | -0.70 (-1.67; 0.27)       | 0.15        | -0.03 (-0.11; 0.06)      | 0.54 |
| MVPA (min/day)              | <b>0.01 (0.003, 0.02)</b>     | <b>0.01</b> | <b>0.16 (0.02; 0.31)</b>      | <b>0.03</b>      | 0.32 (-0.16; 0.8)         | 0.18        | 0.00 (-0.04; 0.04)       | 0.98 |

<sup>a</sup> log transformed values were used in the regression analyses. All models adjusted for maternal BMI, age and parity. MVPA and sedentary time are simultaneously in the models. Thus, they are adjusted for /independent of each other. Bold font indicates significant associations. B=Beta, and CI= Confidence Interval.

**Supplementary Table S3.** Associations (linear regression models) of maternal moderate-to-vigorous physical activity (MVPA) and sedentary time (ST) with pro/anti-oxidative stress and HDL-related markers in cord blood.

| <b>&lt; 20 weeks (n=37)</b> | <b>AOPP<sup>a</sup>,<br/>umol/L<br/>B (95% CI)</b> | <b>P</b>    | <b>Inhibition of<br/>oxidation, %<br/>B (95% CI)</b> | <b>P</b>    | <b>AE activity,<br/>mM/min/ml<br/>B (95% CI)</b> | <b>P</b> | <b>Cholesterol<br/>Efflux, %<br/>B (95% CI)</b> | <b>P</b> |
|-----------------------------|----------------------------------------------------|-------------|------------------------------------------------------|-------------|--------------------------------------------------|----------|-------------------------------------------------|----------|
| Sedentary time (% weartime) | 0.01 (-0.01; 0.01)                                 | 0.46        | <b>0.32 (0.10; 0.54)</b>                             | <b>0.01</b> | -0.028 (-1.47; 0.91)                             | 0.63     | 0.01 (-0.06; 0.08)                              | 0.71     |
| MVPA (min/day)              | 0.01 (-0.01; 0.03)                                 | 0.21        | <b>0.11 (0.01; 0.21)</b>                             | <b>0.03</b> | 0.49 (-0.05; 1.03)                               | 0.08     | -0.01 (-0.05; 0.02)                             | 0.36     |
| <b>24-28 weeks (n=35)</b>   |                                                    |             |                                                      |             |                                                  |          |                                                 |          |
| Sedentary time (% weartime) | 0.01 (-0.01; 0.03)                                 | 0.23        | 0.16 (-0.06; 0.39)                                   | 0.14        | -0.003 (-1.15; 1.14)                             | 0.99     | -0.001 (-0.08; 0.07)                            | 0.97     |
| MVPA (min/day)              | 0.003 (-0.00; 0.01)                                | 0.36        | <b>0.12 (0.03; 0.22)</b>                             | <b>0.01</b> | 0.47 (-0.01; 0.95)                               | 0.06     | -0.001 (-0.03; 0.03)                            | 0.95     |
| <b>35-37 weeks (n=31)</b>   |                                                    |             |                                                      |             |                                                  |          |                                                 |          |
| Sedentary time (% weartime) | 0.02 (-0.004; 0.04)                                | 0.12        | 0.17 (-0.13; 0.46)                                   | 0.25        | -0.63 (-1.56; 0.31)                              | 0.18     | -0.04 (-0.14; 0.05)                             | 0.36     |
| MVPA (min/day)              | <b>0.01 (0.003; 0.02)</b>                          | <b>0.01</b> | <b>0.18 (0.04; 0.32)</b>                             | <b>0.02</b> | 0.42 (-0.03; 0.87)                               | 0.07     | -0.004 (-0.05; 0.04)                            | 0.85     |

<sup>a</sup> log transformed values were used in the regression analyses. All models adjusted for maternal BMI, age and parity. MVPA and sedentary time are simultaneously in the models, Thus, they are adjusted for /independent of each other. Bold font indicates significant associations. B=Beta, and CI= Confidence Interval.
